1 Targeted Molecular Dynamics Simulations Suggest Direct  
2 Ligand Competition as a Plausible Efflux Inhibition Mechanism  
3 in the Multidrug Resistance Pump AcrB.

4

5 Lande Silva Jr <sup>a,\*</sup>, Pedro Eduardo Almeida da Silva <sup>a</sup>, Karina S. Machado <sup>b</sup>, Nelson  
6 Dutra <sup>b</sup>, Terry P. Lybrand <sup>d</sup>.

7 <sup>a</sup> *Núcleo de Pesquisa em Microbiologia Médica, Faculdade de Medicina, Universidade*  
8 *Federal do Rio Grande – FURG, Rio Grande, Brazil.*

9 <sup>b</sup> *Centro de Ciências Computacionais, Universidade Federal de Rio Grande, Brazil.*

10 <sup>c</sup> *Universidade Federal de Pelotas – UFPEL, Rio Grande, Brazil.*

11 <sup>d</sup> *Department of Chemistry, Department of Pharmacology, & Center for Structural*  
12 *Biology, Vanderbilt University, Nashville, TN, United States of America.*

13 *\* Corresponding author. Núcleo de Pesquisa em Microbiologia Médica, Faculdade de*  
14 *Medicina, Universidade Federal do Rio Grande – FURG, Rio Grande, Brazil.*

15 *E-mail address: [lande.jr@gmail.com](mailto:lande.jr@gmail.com) (Lande Silva Jr).*

16

## 17 **Abstract**

18 We report computer simulation results using the Targeted Molecular Dynamics  
19 technique to explore possible transport mechanisms in the multidrug efflux pump AcrB  
20 for two substrates, ethidium bromide and a tetrahydropyridine derivative. These studies  
21 revealed structural elements, including specific  $\alpha$ -helices,  $\beta$ -strands and flexible loops  
22 that define a physically plausible pathway for substrates to the extracellular  
23 environment. These calculation results can be used to plan future biophysical  
24 experiments and may suggest interesting drug design possibilities to address drug  
25 resistance due to AcrB function.

## 26 **Importance**

27 Addressing the issue of antimicrobial resistance mediated by efflux, this study  
28 presents possible binding sites and structures in the AcrB MDR pump that could be  
29 molecular targets for drugs. Targeted molecular dynamics simulations suggested that  
30 these sites and structures seem vital for a successful efflux. The AcrB is proposed to be  
31 divided into three distinct zones, with loops, sheets and helices mediating the passage of  
32 molecules from one zone to another. We also described possible capture sites on the

33 outer part of the protein and access ways to its interior. Finally, we proposed that ligand  
34 competition for same pathways could be thought as an efflux inhibitory mechanism,  
35 thus assisting to conceive new ways of designing efflux pump inhibitors.

36

37 **Keywords:** efflux; inhibition mechanism; competition; Targeted Molecular Dynamics;  
38 AcrB.

## 39 1. Introduction

40

41 The multidrug efflux pump AcrB from *Escherichia coli*, a member of the  
42 resistance-nodulation division (RND) family transporters, has been studied extensively  
43 as a model for RND efflux pumps that occur in gram-negative bacteria. It is responsible  
44 for the capture and extrusion of a wide variety of substrates, like dyes, heavy metals and  
45 antibiotics from the cell (1). These efflux pumps contribute to bacterial resistance for  
46 many antimicrobial agents and biocides (2), and thus constitute a major public health  
47 concern (3). Therefore, it is important to obtain a more detailed understanding of the  
48 AcrB ligand capture-extrusion mechanism, as this information may suggest effective  
49 strategies to inhibit the efflux process, thus improving the efficacy of antimicrobials and  
50 reducing drug resistance in many gram-negative microorganisms.

51 Targeted Molecular Dynamics (TMD) is a method that induces conformational  
52 changes in a structure based solely on constraints applied to minimize the root mean  
53 square deviation between initial and final (target) structures (4). TMD has been used  
54 previously to examine protein conformational changes induced by ligand binding (5)  
55 and to explore ligand binding reaction coordinates (6). The only information necessary  
56 to perform TMD calculations are detailed three-dimensional structures for the complex  
57 in both an initial (I) and a final (F), or target, state. The I and F states are usually  
58 obtained from x-ray diffraction or NMR studies for the ligand-protein complex. If  
59 structures are available only for the unliganded protein, as is the case for AcrB in this  
60 work, plausible I and F states can be generated using molecular docking calculations.  
61 TMD calculations were performed for both ethidium bromide (EtBr) and a  
62 tetrahydropyridine derivative NUNL02 (7)(8) (Fig. A1) to characterize possible

63 transport pathways in AcrB for the ligands from the intracellular surface to the TolC  
64 domain.

65 The TMD simulations revealed interesting conformational changes in the protein  
66 backbone as the ligands progressed through AcrB from the cytosolic interface to the  
67 periplasmic surface. These results reinforce the idea of competition as a mechanism of  
68 efflux inhibition discussed in (9), in the present work, however, different ligands seem  
69 to interfere with transport of each other by utilizing the same transit “pathways” through  
70 the protein structure.

## 71 **2. Material and Methods**

72

### 73 *2.1 Docking*

74 The AcrB structure without bound ligands (PDB ID: 1IWG) (10) is considered  
75 to be in the resting state for the transporter and was chosen for the TMD studies. This  
76 ligand-free, symmetric homotrimer structure has a resolution of 3.5 Å, and 1053  
77 residues in each subunit. The structure is divided into three domains: a transmembrane  
78 domain, a pore domain and the TolC interaction domain that together constitute the  
79 periplasmic headpiece (10) (11) (Fig. 1). Some short loop segments, between residues  
80 496 and 513, 708 and 716 and 858 and 871, were not resolved in the x-ray structure,  
81 and we used Modeller 9.14 (12) (13), with default parameters, to construct them.

82 Experimental results suggest that both EtBr and NUNL02 are substrates for the  
83 multidrug efflux pump AcrB (9) (11) (14). Following the docking methodology  
84 described in (9), we used Autodock Tools (15) and AutoDock Vina (16) to locate high-  
85 affinity binding sites for the substrates EtBr and NUNL02 in chain A of the full AcrB  
86 model, ranked by free energy of binding (FEB) scores. Dockings were performed with  
87 the exhaustiveness set to 8 (run 1), and later set to 128 (search grid sizes of 40 x 48 x 7  
88 and 65 x 65 x 23, respectively) (run 2). The grids were moved from immediately below  
89 the transmembrane domain to the TolC domain, in steps of 5 Å in both cases, as  
90 previously described (9). Positions A, B, C, D and E (Fig. 1) were determined from run  
91 1 and confirmed with run 2 and by comparison with dockings performed for structure  
92 PDB ID: 4DX5-A (17). No significant differences for determining the I and F positions  
93 for the TMD were found between the docking runs (Fig. A2 to A5). The docking  
94 calculations generated five favorable binding sites in the AcrB structure, including  
95 positions A and B in the transmembrane domains, positions C and D in the pore domain  
96 and position E in the TolC domain (Fig. 1) (Table 1). Position A had reasonable FEB

97 scores in run 1 and 2 at the AcrB surface at the cytosol-membrane interface, and we  
98 selected this location to represent the initial state for modeling ligand capture and efflux  
99 directly from the cytosol to the periplasmic region. Position E does not have a  
100 particularly favorable docking score compared to the other selected docking poses, but  
101 was chosen to represent a position completely outside the AcrB structure, i.e., a position  
102 for an extruded ligand, and we used the position E complex as the F state. Since AcrB  
103 forms a complex with the TolC protein (11), the ligand would likely be bound to the  
104 TolC protein at position E. Since the IIWG crystal structure presumably represents the  
105 inactive state of the transporter, it is possible that these predicted ligand binding sites  
106 might not be mechanistically relevant. However, previous molecular docking studies (9)  
107 using the AcrB 4DX5 chain A crystal structure (17), presumed to represent an active  
108 state of the transporter, yielded EtBr and NUNL02 binding sites that correspond closely  
109 to the binding sites identified in the current study (Fig. A6 to A9). Therefore, we used  
110 the five positions illustrated in Fig. 1, as initial and final states for a series of TMD  
111 simulations to explore plausible ligand efflux pathways. A symmetric homotrimeric  
112 structure was then generated using the full chain A model with Pymol (18). Figures  
113 were made with VMD (19) and Pymol (18).

114

## 115 *2.2 Targeted Molecular Dynamics*

116 We chose the TMD method for this study because this technique does not require  
117 an explicit definition of a detailed reaction pathway or restraint coordinates that could  
118 potentially bias results if inappropriate restraints were applied. The full efflux pathway  
119 was sub-divided into discrete steps, each probed with individual TMD simulations, to  
120 facilitate study of alternate possible pathways.

121 *Pathway 1:* In this pathway, either EtBr or NUNL02 was placed initially at  
122 position A. Sequential TMD simulations were then performed to follow ligand transit  
123 from position A to position C, then position C to position D, and finally position D to  
124 position E outside the AcrB protein (Fig. 1 and 2). We did not attempt to model detailed  
125 mechanisms for the initial binding of either ligand to position A. Position A simply  
126 represents a plausible site for initial ligand binding if AcrB captures the ligand directly  
127 from the cytoplasm as suggested in a previous study (10).

128 Pathway 2: In this pathway, either EtBr or NUNL02 was placed initially at  
129 position B. Position B represents a plausible initial ligand binding site if AcrB captures  
130 the ligand from the membrane domain rather than the cytoplasm as proposed by  
131 Nikaido, et al. (20). TMD simulations were then run to follow ligand migration from  
132 position B to position C. After this point, all Pathway 2 details are identical to Pathway  
133 1.

134 All simulations were performed using the AMBER 12 package (21). Atomic  
135 charges and any additional missing parameters for EtBr and NUNL02 were generated  
136 using the ANTECHAMBER utility in AmberTools14 (22). The xLeap module was used  
137 to add missing hydrogens and Na<sup>+</sup> counterions to neutralize the full complex, and the  
138 system was solvated in a truncated octahedron water box. Since the periplasmic  
139 headpiece (the pore domain and the TolC interaction domain) constitute the majority of  
140 the AcrB transporter, we decided to perform solution phase simulations rather than  
141 construct a more complicated aqueous bilayer model to embed the transmembrane  
142 domain. We monitored the transmembrane domain helical bundle during the  
143 simulations to confirm its structural stability during the solution phase simulations. To  
144 ensure that the initial and final states for each TMD simulation contained identical  
145 numbers of water molecules, the solvation calculations were performed with ligand  
146 present at both the initial (position A or B) and final (position E) sites. A single ligand  
147 was then deleted as appropriate to generate either the initial or final state model,  
148 respectively.

149 For each solvated complex, the protein and ligand atom positions were  
150 constrained while water molecules and counterions were relaxed with 500 steps of  
151 steepest decent minimization followed by 500 steps of conjugate gradient minimization  
152 using an 8 Å nonbonded cutoff. Next, the full protein-ligand complex along with  
153 solvent and counterions was relaxed with 1000 steps of steepest descent and 1500 steps  
154 of conjugate gradient minimization using a 10 Å nonbonded cutoff and particle-mesh  
155 Ewald corrections for long-range electrostatics (23). The ff12SB and gaff force fields  
156 were used, respectively, for protein and ligands. Then, each solvated complex was  
157 heated slowly from 0 to 300K during a 20 ps NPT ensemble MD simulation, with  
158 protein heavy atoms weakly restrained at the minimized structure. The 300K NPT MD  
159 simulation was propagated for an additional 100 ps with no positional results to

160 generate starting configurations for each TMD calculation. All TMD simulations were  
161 performed using both 0.5 kcal/mol-Å and 1.0 kcal/mol-Å force constants to assess  
162 possible biasing effects of restraint force constant choice.

### 163 **3. Results**

164

#### 165 *3.1 Molecular Docking*

166

167 Molecular docking calculations were performed independently for each ligand.  
168 Fig. 1 highlights the significant overlap for EtBr (red CPK) and NUNL02 (yellow CPK)  
169 at all five binding sites, suggesting the possibility of direct efflux competition between  
170 these substrates, as these binding sites represent stable intermediate states along the  
171 simulated efflux pathways. As noted above, molecular docking calculations using either  
172 the 1IWG crystal structure (inactive conformation) or the 4DX5-A crystal structure  
173 (active conformation) yielded very similar binding poses for all five positions depicted  
174 in Fig. 1, so the docking results do not appear to be particularly sensitive to the exact  
175 protein conformation, as least for these five binding sites.

176

#### 177 *3.2 Efflux Pathways*

##### 178 *3.2.1 Pathway 1*

179

180 The TMD results for this pathway show that both ligands follow  
181 essentially the same path as they traverse from position A to position D through the  
182 AcrB protein, as displayed in Fig. 2 and in the animated movies A.10 and A.11.  
183 Interestingly, from position D to position E, the EtBr and NUNL02 paths begin to  
184 diverge significantly. Detailed analysis of pathway 1 for EtBr efflux suggests a gated  
185 transit mechanism through an extended tunnel with constriction points that open  
186 transiently, apparently as result of specific interactions with the ligand. Dividing  
187 pathway 1 into three distinct zones made it easier to identify residues and structural  
188 elements that appear to play an important role in the substrate efflux mechanism (Fig.  
189 3).

190 Zone 1 (Fig. 4) is localized to the transmembrane domain. This region has a total

191 of 12 transmembrane  $\alpha$ -helices (10), 9 of which form an apparent transit tunnel through  
192 the transmembrane domain from the cytosolic surface to the boundary with the pore  
193 domain. These nine helices are displayed in Fig. 4. Table 2 lists the residues in each  
194 helix.

195 Position A (Fig. 5a) identified in the molecular docking calculations is the initial  
196 ligand binding site for pathway 1. Initial ligand binding at this position would enable the  
197 AcrB efflux pump to transport molecules directly from the cytoplasm. Ligand transport  
198 through Zone 1 is correlated with a peristaltic motion of the nine  $\alpha$ -helices that form the  
199 transient tunnel, as displayed in Fig. 5. Initially, the helices are packed tightly when the  
200 ligand binds at position A. As the ligand enters Zone 1, the helical bundle relaxes (Figs.  
201 5b and 5c), providing a transient passageway for the ligand to navigate through the  
202 transmembrane domain. As the ligand exits Zone 1 to occupy position C (Fig. 5d), the  
203 helical bundle reverts to the tightly packed conformation observed before ligand entry.  
204 It appears that these conformational changes are induced by ligand interactions, as these  
205 conformational fluctuations are not observed in the Zone 1 helical bundle in the absence  
206 of ligand. The two helices displayed in yellow in Fig. 5 correspond to helices 6 and 7  
207 (Fig. 4). In fact, these helices may be a single helix with a flexible “elbow” segment at  
208 residues 478-480. Backbone conformational changes at these residues, induced by the  
209 ligand, result in a significant reorientation of helical segment 6 relative to helix 7. The  
210 reorientation of helix 6, along with more modest shifts for helices 1 and 2 (Fig. 6),  
211 reduce the tight helix bundle packing and generate a transient passageway large enough  
212 for the ligand to navigate.

213

214 Zone 2 (Fig. 3 and 7 in green) is composed primarily of  $\beta$ -strands and flexible  
215 loops, and is localized within the AcrB pore domain (10). The  $\beta$ -strand structure is quite  
216 stable and exhibits minimal structural fluctuation or positional displacement during the  
217 MD simulations, with the exception of one  $\beta$ -strand indicated by an arrow in Figs. 7 and  
218 8a. The flexible loop and mobile  $\beta$ -strand residues are listed in Table 3. As the domain  
219 designation indicates, the  $\beta$ -strands form a well-defined pore connecting the  
220 transmembrane domain and the TolC interaction domain. Flexible loops 1 and 2 (Figs. 7  
221 and 8) form a barrier or gate separating the transmembrane and pore domains during the  
222 MD simulations. However, when a ligand is present at position C, these loops undergo a  
223 conformational change that allows ligand passage into the pore domain. The loop



224 conformational changes are accompanied by a shift of the amino-terminal end of one  $\beta$ -  
225 strand segment to permit ligand entry to the pore (Figs. 7 and 8). As the ligand traverses  
226 the pore region and reaches position D at the boundary of the pore domain and the TolC  
227 interaction domain, loops 1 and 2 assume their original “closed” conformation observed  
228 prior to ligand entry.

229 As the ligand approaches the boundary of the pore and TolC interaction domains  
230 (Fig. 7), loop 3 undergoes a significant conformational change and loop 4, immediately  
231 below loop 3, displays a modest conformational change (Fig. 9, panel a and b). These  
232 conformational changes allow the ligand to move into the TolC domain (Zone 3).

233

234 Zone 3, displayed in blue in Figures 3 and 9, consists of short helices and  $\beta$ -  
235 strands with numerous connecting loops in the TolC interaction domain. As the ligand  
236 moves from the pore domain into the TolC domain, helices 10 and 11 reorient to create  
237 an open passageway through the TolC domain. Loop 5 at the surface is quite flexible  
238 and undergoes a conformational change that allows the ligand to “escape” the AcrB  
239 protein into solution (i.e., the periplasmic space). While pathways for both ligands are  
240 nearly identical through Zones 1 and 2, the detailed features for EtBr and NUNL02 exit  
241 paths differ in Zone 3. NUNL02 rapidly exits Zone 3 to solution, while EtBr traverses  
242 the TolC domain interior and exits only after loop 5 opens sufficiently to allow passage  
243 (Fig. 9, Table 4).

244 There is evidence to suggest that the TolC protein forms a complex with AcrB  
245 (24) (25). Loop 5 likely forms a portion of the AcrB-TolC interface, and explicit  
246 inclusion of the TolC protein in these models would clearly influence, and probably  
247 alter, details of the observed ligand transit pathways through the Zone 3 region.

248

### 249 3.2.2 Pathway 2

250

251 The ligand entry point for pathway 2 is from the bilayer, as proposed previously  
252 by Nikaido *et al.* (20), unlike pathway 1 where ligands are captured directly from the  
253 cytoplasm. Position B identified in the docking calculations is used as the initial state  
254 for the pathway 2 TMD simulations (Fig. 10). The simulations reveal that ligands do not  
255 enter the transmembrane domain (Zone 1) directly from position B, but instead slide



256 along the exterior of the transmembrane domain and penetrate the AcrB protein near  
257 position C (Fig. 10 and movies in A.12 and A.13).

258

259

260 There are no significant conformational changes or helix reorientations observed  
261 as ligands slide along the transmembrane domain helix bundle exterior. As the ligands  
262 approach the top of the helix bundle, loop 1 (Fig. 11) assumes an alternate conformation  
263 to allow ligand access to position C (the final state in this TMD segment). From position  
264 C, the remainder of the ligand efflux pathway is indistinguishable from pathway 1  
265 described above.

266

#### 267 **4. Discussion**

268

269 The asymmetric configuration of the AcrB structure 4DX5 suggests an  
270 intriguing model for drug transport, based on conformational cycling of the monomers  
271 between loose, tight and open configurations (24) (11). However, in this study, we used  
272 the symmetric structure 1IWG and the TMD results suggest that each monomer may be  
273 able to function independently, capturing and conducting the substrate to the TolC  
274 protein for final extrusion. This independent monomer mechanism is much simpler as it  
275 does not require extensive interaction, e.g., “communication”, between the three  
276 monomers during the efflux process. This mechanism also implies greater efflux  
277 efficiency if all three monomers could function independently. However, our current  
278 calculations do not suggest in any way that the trimer cycling mechanism is not also  
279 plausible, and the actual efflux mechanism might involve components of both models.

280 In this work, our division of the AcrB protein into three distinct zones is based  
281 primarily on our molecular docking studies, which identified stable, intermediate binding  
282 sites for EtBr and NUNL02. However, we note that our domain or zone definitions  
283 correspond closely to the original structural characterization of three distinct domains  
284 (10). It seems unlikely that this close correspondence between structural and  
285 “functional” domain characterization is coincidence.

286 Independent proposals suggest that AcrB captures ligands directly from the  
287 cytoplasm (26) or from the outer leaflet of the cytoplasmic membrane (20). We explored  
288 both options in our current studies. Docking position A that functions as the starting

289 point for efflux pathway 1 is consistent with direct ligand capture from the cytoplasm.  
290 This direct capture mechanism is simple and does not depend upon ancillary proteins,  
291 e.g., EmrR or MdfA, to transport ligands to the periplasmic space prior to AcrB capture  
292 (27).

293 The transmembrane domain is an  $\alpha$ -helical bundle that forms a tunnel-like  
294 structure in the Zone 1 region of efflux pathway 1. The TMD results suggest that  
295 ligands can traverse this apparent tunnel passage with negligible energy barriers and  
296 only modest protein conformational changes. After the ligand has moved through Zone  
297 1, the helical bundle quickly relaxes back to the starting protein conformation. We  
298 observed a peristaltic motion of the helical bundle as the ligand transits, but this motion  
299 is likely due to induced conformational changes caused by the ligand transit process. At  
300 present, we have no evidence that this peristaltic motion of the helical bundle is an  
301 intrinsic feature of the AcrB protein.

302 Docking position C is located in Zone 2, the AcrB pore domain, and is the most  
303 favorable ligand binding site in the entire protein identified in our docking calculations  
304 (Table 1). Access to position C (Fig. 10b) is controlled by conformational changes in  
305 loops 1 and 2 (Fig. 8) for efflux pathway 1, and conformational changes in loops 1, 2  
306 and 6 (Fig. 11) for efflux pathway 2. Position C appears to correspond closely to a deep  
307 binding pocket described previously by Eicher *et al.* (17), and loops 1, 2 and/or 6 would  
308 correspond to the “switch-loops” they described that control access to the ligand  
309 binding pocket.

310 There is also a pair of flexible loops 3 and 4 (Fig. 12) that control the exit of  
311 ligand from Zone 2, the pore domain, to Zone 3, the TolC domain. Thus, there appears  
312 to be a clear “gating” mechanism for ligand entrance and exit in the pore domain. As  
313 noted above, once the ligand reaches Zone 3, exit from the AcrB protein is facile and  
314 rapid. Explicit inclusion of the TolC protein in the complex would certainly alter this  
315 final exit process, but we cannot speculate on the details based on our current  
316 calculations.

317

318 Pathway 2 is interesting because position B, on the exterior surface of the  
319 transmembrane domain in the cytoplasmic membrane outer leaflet region, is a  
320 plausible capture point for nonpolar ligands that might localize in the membrane. TMD  
321 results suggest that the substrate slides along the helical bundle surface until it finds an

322 entrance point and reaches position C. Loops 1, 2 and 6 (Fig. 11) control access for  
323 ligands from the helix bundle exterior in the outer leaflet region to position C in the  
324 pore domain. The possibility of lateral capture of substrates from the outer leaflet of the  
325 cytoplasmic membrane is intriguing and might have a favorable impact on efflux  
326 efficiency. The substrate would have a larger area to dock, rather than a small, specific  
327 binding site, e.g., position A in Zone 1. Of course, it is possible that some ligands might  
328 prefer pathway 1 and others pathway 2, e.g., as a function of ligand lipophilicity, etc.

329 The TMD results suggest that, for both pathways, the substrates EtBr and  
330 NUNL02 follow very similar efflux trajectories until position D, where the two ligand  
331 display dramatically different exit trajectories (Fig. 2). As noted above, explicit  
332 inclusion of the TolC protein in the complex would undoubtedly alter the exit pathway  
333 details from position E substantially for both ligands. It is known that NUNL02 has high  
334 affinity for AcrB, and these simulation results support the possibility of efflux inhibition  
335 by competition between substrates as proposed previously (9). Thus, successful efflux  
336 inhibitor design may not require development of molecules that block drug binding at  
337 key sites or entry points via direct competitive binding, but simply discovery of  
338 molecules that follow similar efflux trajectory pathways, thus diminishing drug efflux  
339 by saturating the transport path, effectively creating a “traffic jam”.

340 Finally, the TMD results showed no evidence that substrates might be extruded  
341 through the AcrB central pore, in good agreement with a previous study (26).

342

## 343 **5. Conclusion**

344 The technique of Targeted Molecular Dynamics was used to study how EtBr and  
345 NUNL02 might be captured and transported by the AcrB efflux pump. The simulations  
346 were performed for two distinct efflux pathways, based on two difference proposals for  
347 substrate capture, and revealed that loops 1, 2 and 6 (border of Zones 1 and 2), 3 and 4  
348 (border of Zones 2 and 3), and 5 (Zone 3),  $\alpha$ -helices 1 to 9 (Zone 1), 10 and 11 (Zone 3)  
349 and a  $\beta$ -strand (residues 132-144, Zone 2) play an active role in transport, interacting  
350 extensively with the substrates as they were extruded. Further, the simulations suggested  
351 that EtBr and NUNL02 would compete for the same efflux routes, regardless of specific  
352 pathway. This finding suggests that the mechanism of efflux inhibition by competition  
353 between molecules is plausible. These calculations provide molecular details for  
354 plausible substrate efflux pathways and suggest a number of new biophysical

355 experiments to address the AcrB efflux mechanism in greater detail.

356

357 **Acknowledgements:** Lande Silva Jr wishes to thank Dr. Jonathan Sheeham, for his  
358 teachings in molecular dynamics, and all the staff of the Center for Structural Biology  
359 from Vanderbilt University, TN, USA.

360

361 **Funding:** This work was supported by the Coordenação de Aperfeiçoamento de Pessoal  
362 de Nível Superior/Ministério da Educação (CAPES/MEC), Brazil, doctoral grant to  
363 Lande Silva Jr and Karina S. Machado acknowledges CAPES “edital biologia  
364 computacional número 051/2013”.

365 Conflict of interests: None declared.

366 Ethical approval: Not required.

### 367 **References**

- 368 1. Li X-Z, Plésiat P, Nikaido H. The challenge of efflux-mediated antibiotic resistance in  
369 Gram-negative bacteria. Clin Microbiol Rev [Internet]. 2015;28(2):337–418. Available  
370 at:  
371 <http://www.ncbi.nlm.nih.gov/pubmed/25788514>[http://www.pubmedcentral.nih.g](http://www.pubmedcentral.nih.gov/articlerender.fcgi?artid=PMC4402952)  
372 [ov/articlerender.fcgi?artid=PMC4402952](http://www.pubmedcentral.nih.gov/articlerender.fcgi?artid=PMC4402952)
- 373 2. Blair JMA, Richmond GE, Piddock LJ V. Multidrug efflux pumps in Gram-negative  
374 bacteria and their role in antibiotic resistance. Future Microbiol [Internet].  
375 2014;9(10):1165–77. Available at:  
376 [http://www.futuremedicine.com/doi/abs/10.2217/fmb.14.66?url\\_ver=Z39.88-](http://www.futuremedicine.com/doi/abs/10.2217/fmb.14.66?url_ver=Z39.88-2003&rfr_id=ori%3Arid%3Acrossref.org&rfr_dat=cr_pub%3Dpubmed&)  
377 [2003&rfr\\_id=ori%3Arid%3Acrossref.org&rfr\\_dat=cr\\_pub%3Dpubmed&](http://www.futuremedicine.com/doi/abs/10.2217/fmb.14.66?url_ver=Z39.88-2003&rfr_id=ori%3Arid%3Acrossref.org&rfr_dat=cr_pub%3Dpubmed&)
- 378 3. Paphitou NI. Antimicrobial resistance: Action to combat the rising microbial challenges.  
379 Int J Antimicrob Agents. 2013;42(SUPPL.1).
- 380 4. Schlitter J, Engels M, Krüger P. Targeted molecular dynamics: A new approach for  
381 searching pathways of conformational transitions. In: Journal of Molecular Graphics.  
382 1994. p. 84–9.
- 383 5. Lee HS, Robinson RC, Joo CH, Lee H, Kim YK, Choe H. Targeted molecular dynamics  
384 simulation studies of calcium binding and conformational change in the C-terminal half  
385 of gelsolin. Biochem Biophys Res Commun [Internet]. 2006;342(3):702–9. Available at:  
386 [16494841](https://pubmed.ncbi.nlm.nih.gov/16494841/)
- 387 6. Aci-Sche S, Genest M, Garnier N. Ligand entry pathways in the ligand binding domain of

- 388 PPAR $\gamma$  receptor. FEBS Lett. 2011;585(16):2599–603.
- 389 7. Zanatta N, da S. Fernandes L, Nachtigall FM, Coelho HS, Amaral SS, Flores AFC, et al.  
390 Highly Chemoselective Synthesis of 6-Alkoxy-1-alkyl(aryl)-3-trifluoroacetyl-1,4,5,6-  
391 tetrahydropyridines and 1-Alkyl(aryl)-6-amino-3-trifluoroacetyl-1,4,5,6-  
392 tetrahydropyridines. European J Org Chem [Internet]. março de 2009 [citado 1 de junho  
393 de 2017];2009(9):1435–44. Available at: <http://doi.wiley.com/10.1002/ejoc.200801119>
- 394 8. Zanatta N, da Fernandes LS, München S, Coelho HS, Amaral SS, Fantinel L, et al. An  
395 Efficient Synthesis of Oxa- and Aza-Condensed Tetrahydropyridines from Cyclic Enones.  
396 Synthesis (Stuttg). 05.05.2010. 2010;2010(14):2348–54.
- 397 9. Silva L, Carrion LL, von Groll A, Costa SS, Junqueira E, Ramos DF, et al. In vitro and in  
398 silico analysis of the efficiency of tetrahydropyridines as drug efflux inhibitors in  
399 Escherichia coli. Int J Antimicrob Agents. 2017;49(3):308–14.
- 400 10. Murakami S, Nakashima R, Yamashita E, Yamaguchi A. Crystal structure of bacterial  
401 multidrug efflux transporter AcrB. Nature [Internet]. 2002;419(6907):587–93. Available  
402 at: <http://www.nature.com/doi/10.1038/nature01050>
- 403 11. Seeger MA, Diederichs K, Eicher T, Brandstätter L, Schiefner A, Verrey F, et al. The AcrB  
404 efflux pump: conformational cycling and peristalsis lead to multidrug resistance. Curr  
405 Drug Targets [Internet]. 2008;9(9):729–49. Available at:  
406 <http://www.ncbi.nlm.nih.gov/pubmed/18781920>
- 407 12. Sali A, Blundell TL. Comparative protein modelling by satisfaction of spatial restraints. J  
408 Mol Biol [Internet]. 1993;234(3):779–815. Available at:  
409 <http://www.ncbi.nlm.nih.gov/pubmed/8254673>
- 410 13. Webb B, Sali A. Comparative Protein Structure Modeling Using MODELLER. Curr Protoc  
411 Bioinforma. 2014;47:5 6 1-5 6 32.
- 412 14. Takatsuka Y, Chen C, Nikaido H. Mechanism of recognition of compounds of diverse  
413 structures by the multidrug efflux pump AcrB of Escherichia coli. Proc Natl Acad Sci  
414 [Internet]. 2010;107(15):6559–65. Available at:  
415 <http://www.pnas.org/cgi/doi/10.1073/pnas.1001460107>
- 416 15. Morris G, Huey R. AutoDock4 and AutoDockTools4: Automated docking with selective  
417 receptor flexibility. J .... 2009;30(16):2785–91.
- 418 16. Trott O, Olson AJ. AutoDock Vina: Improving the Speed and Accuracy of Docking with a  
419 New Scoring Function, Efficient Optimization, and Multithreading. J Comput Chem.  
420 2010;31(2):455–61.
- 421 17. Eicher T, Cha H, Seeger MA, Brandstätter L, El-Delik J, Bohnert JA, et al. Transport of

- 422 drugs by the multidrug transporter AcrB involves an access and a deep binding pocket  
423 that are separated by a switch-loop. Proc Natl Acad Sci [Internet]. 10 de abril de  
424 2012;109(15):5687–92. Available at:  
425 <http://www.pnas.org/content/109/15/5687.abstract>
- 426 18. DeLano WL. The PyMOL Molecular Graphics System, Version 1.8. Schrödinger LLC  
427 [Internet]. 2014;<http://www.pymol.org>. Available at: <http://www.pymol.org>
- 428 19. Humphrey W, Dalke A, Schulten K. VMD - Visual Molecular Dynamics. J Mol Graph  
429 [Internet]. 1996;14:33–8. Available at: <http://www.ks.uiuc.edu/Research/vmd/>
- 430 20. Nikaido H, Basina M, Nguyen V, Rosenberg EY. Multidrug Efflux Pump AcrAB of  
431 *Salmonella typhimurium* Excretes Only Those  $\beta$ -Lactam Antibiotics Containing Lipophilic  
432 Side Chains. J Bacteriol [Internet]. 1 de setembro de 1998;180(17):4686–92. Available  
433 at: <http://jb.asm.org/content/180/17/4686.abstract>
- 434 21. Case DA, Darden TA, Cheatham TE, Simmerling CL, Wang J, Duke RE, et al. AMBER 12  
435 OR - University of California, San Francisco [Internet]. University of California, San  
436 Francisco; 2012. Available at: [citeulike-article-id:10779586](http://citeseerx.ist.psu.edu/viewdoc/download?doi=10.1.1.1.1.10779586)
- 437 22. Case DA, Babin V, Berryman JT, Betz RM, Cai Q, Cerutti DS, et al. AMBER 14 [Internet].  
438 San Francisco-CA-USA: University of California, San Francisco; 2014. Available at:  
439 <http://ambermd.org/>
- 440 23. Darden T, York D, Pedersen L. Particle mesh Ewald: An  $N \cdot \log(N)$  method for Ewald  
441 sums in large systems. J Chem Phys [Internet]. 1993;98(12):10089–92. Available at:  
442 <http://aip.scitation.org/doi/10.1063/1.464397>
- 443 24. Seeger MA. Structural Asymmetry of AcrB Trimer Suggests a Peristaltic Pump  
444 Mechanism. Science (80- ) [Internet]. 2006;313(5791):1295–8. Available at:  
445 <http://www.sciencemag.org/cgi/doi/10.1126/science.1131542>
- 446 25. Wang Z, Fan G, Hryc CF, Blaza JN, Serysheva II, Schmid MF, et al. An allosteric transport  
447 mechanism for the AcrAB-TolC multidrug efflux pump. Elife. 2017;6.
- 448 26. Sennhauser G, Amstutz P, Briand C, Storchenegger O, Grütter MG. Drug Export Pathway  
449 of Multidrug Exporter AcrB Revealed by DARPin Inhibitors. PLOS Biol [Internet].  
450 2006;5(1):1–8. Available at: <https://doi.org/10.1371/journal.pbio.0050007>
- 451 27. Tal N, Schuldiner S. A coordinated network of transporters with overlapping specificities  
452 provides a robust survival strategy. Proc Natl Acad Sci [Internet]. 2 de junho de  
453 2009;106(22):9051–6. Available at:  
454 <http://www.pnas.org/content/106/22/9051.abstract>

456

457

458

459

460

461

462

463

464

465

466

467

468

469

470

471 **Figures**

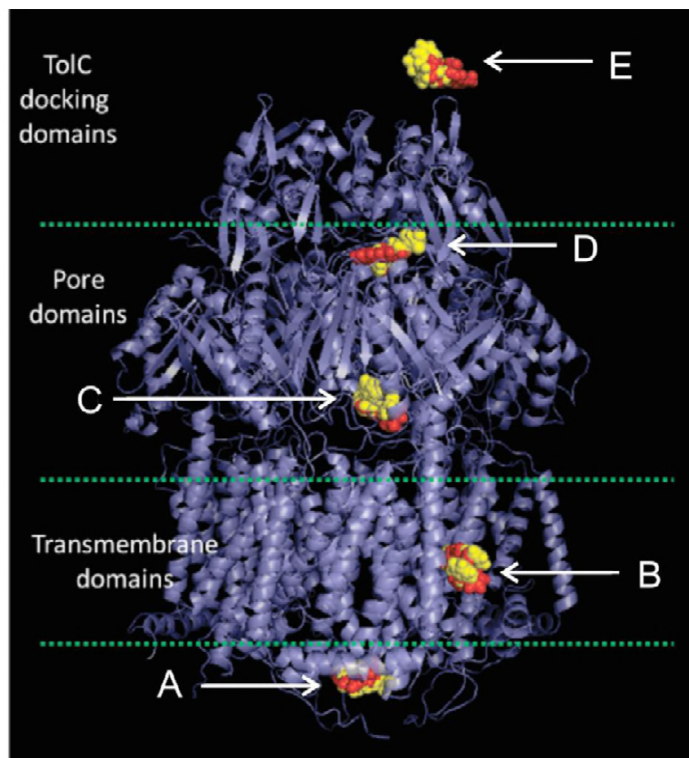

472

473 **Fig. 1.** An overview of the positions chosen for the TMD procedure. EtBr is depicted as

474 red CPK models and NUNL02 as yellow CPK models while the AcrB protein is

475 displayed as a blue ribbon structure. Position A is located at the cytosolic surface of the



476 transmembrane domain, position B is at the transmembrane domain-lipid membrane  
477 interface, position C is at the edge of the pore domain, position D is at the boundary  
478 between the pore and the TolC domains, and position E is outside the TolC domain in  
479 the periplasmic space.

480

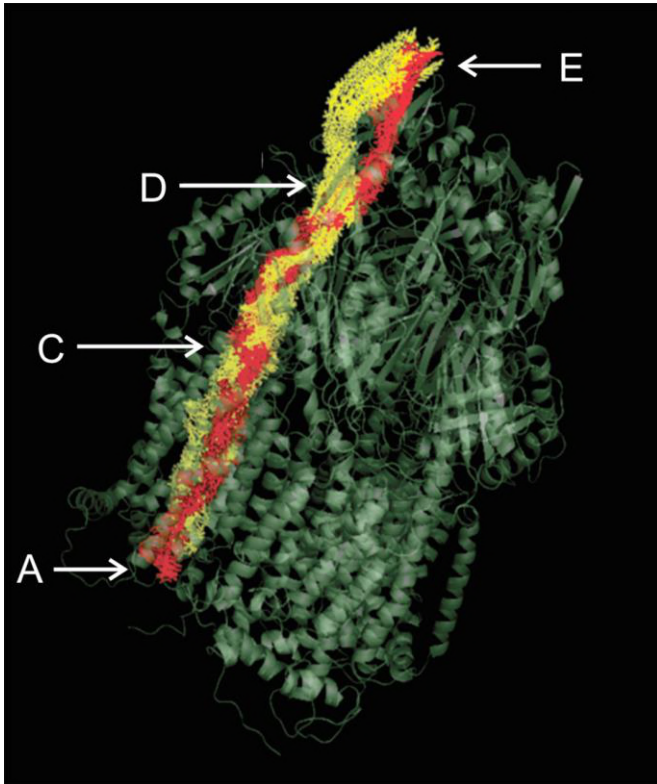

481

**Fig. 2.** The EtBr (red pathway) and NUNL02 (yellow pathway) follow the same path inside the AcrB efflux pump, from position A to C to D. However, the ligand paths begin to diverge after position D.

482

483

484

485

486

487

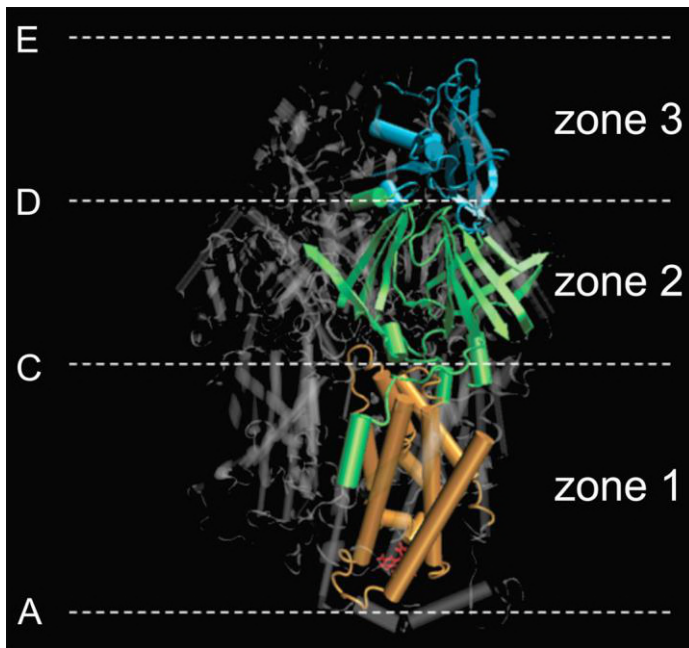

488

489 **Fig. 3.** Pathway 1 zones. Orange: Zone 1, between position A and position C, comprises  
490 much of the transmembrane domain. Green: Zone 2, between position C and position D,  
491 consists primarily of interior  $\beta$ -strand structure in the pore domain. Blue: Zone 3,  
492 between position D and position E, consists of the TolC interaction domain.

493

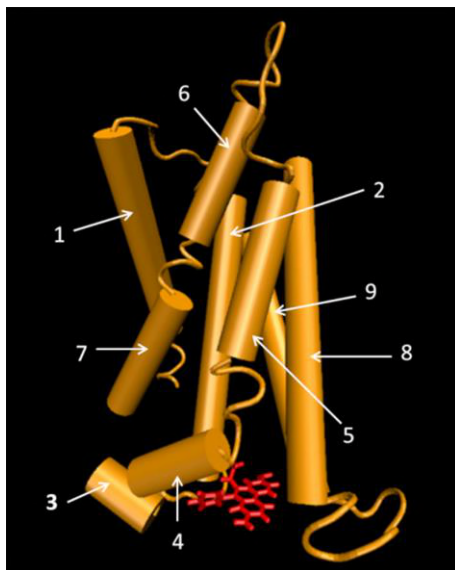

494

495 **Fig. 4.** Zone 1 from pathway 1. The nine  $\alpha$ -helices that form a tunnel structure in  
496 the transmembrane domain are displayed in orange. EtBr (red) is displayed in the  
497 position A binding site at the protein cytosolic surface.

498

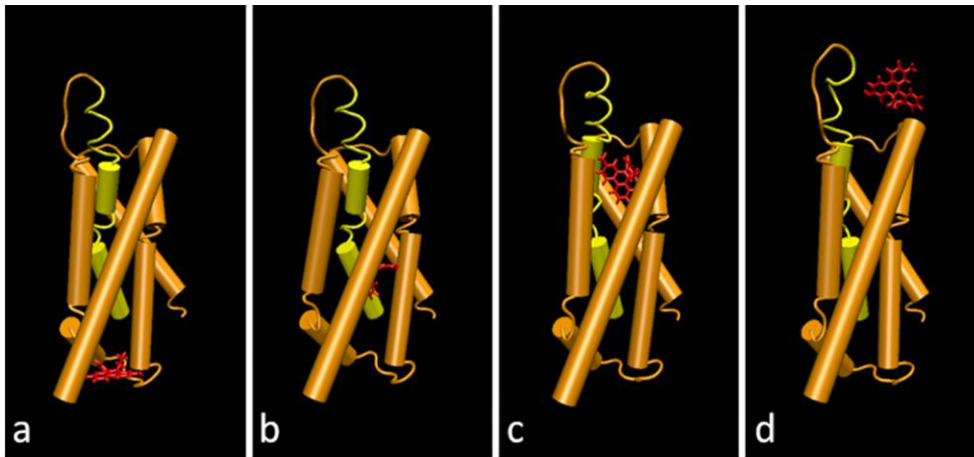

499

500 **Fig. 5.** Helix bundle movements in Zone 1 that are coupled to ligand transit. Helices 6  
501 and 7 are displayed in yellow. Panel a: EtBr is bound at position A and the helix bundle  
502 is tightly packed; Panels b and c: helical shifts reduce the tight bundle packing, allowing  
503 EtBr to enter the transiently opened passageway; Panel d: as EtBr exits Zone 1, the  
504 helical bundle resumes its original tight-packing arrangement.

505

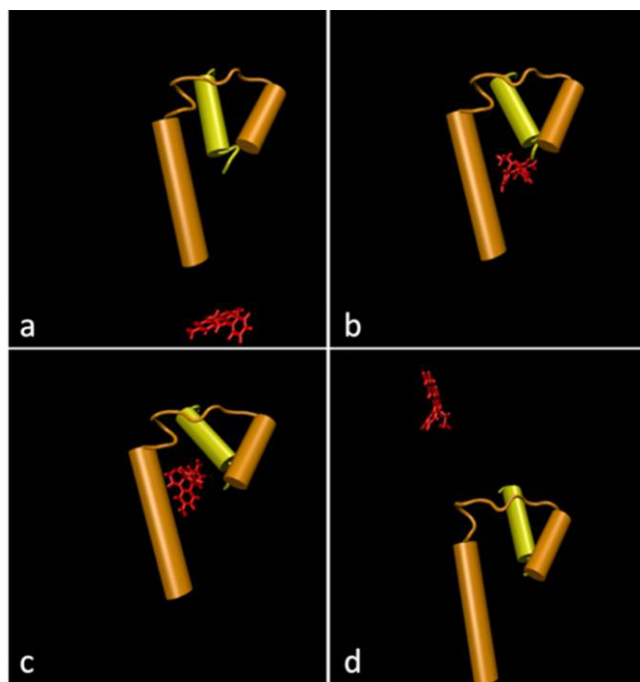

506

507 **Fig. 6.** Detailed view of Helix 6 (yellow) shift during EtBr transit through Zone 1.  
508 Terminal sections of helix 1 and 2 (orange) are also shown, revealing their modest shifts  
509 during substrate transit. Panels a to d correspond to the corresponding images displayed  
510 in Fig. 5, i.e., panel a corresponds to position A, panels b and c are intermediate stages  
511 as EtBr moves through Zone 1, and panel d corresponds to position C.

512

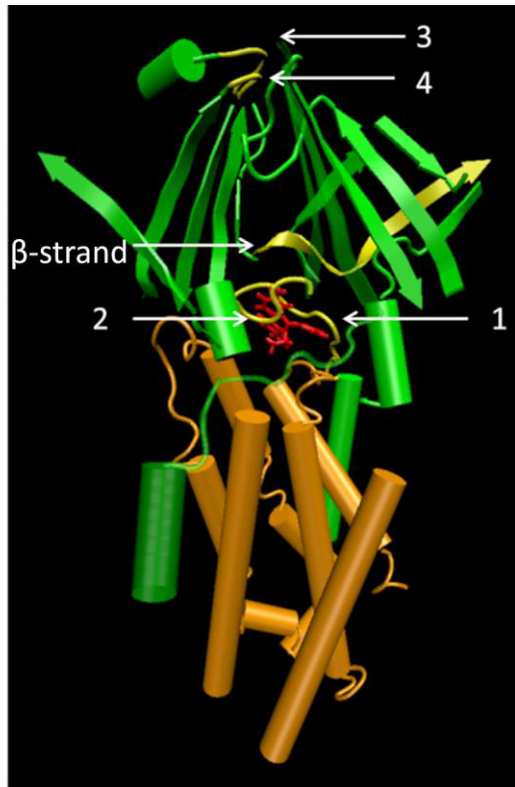

513

514 **Fig. 7:** Zone 2, displayed in green, consists primarily of  $\beta$ -strands that form a well-  
515 defined pore. Loops 1 and 2 form a barrier or gate separating the pore domain (Zone 2)  
516 from the transmembrane domain (Zone 1). Flexible loops 3 and 4 form a barrier  
517 between the pore domain (Zone 2) and the TolC interaction domain (Zone 3; not shown  
518 in this Figure).

519

520

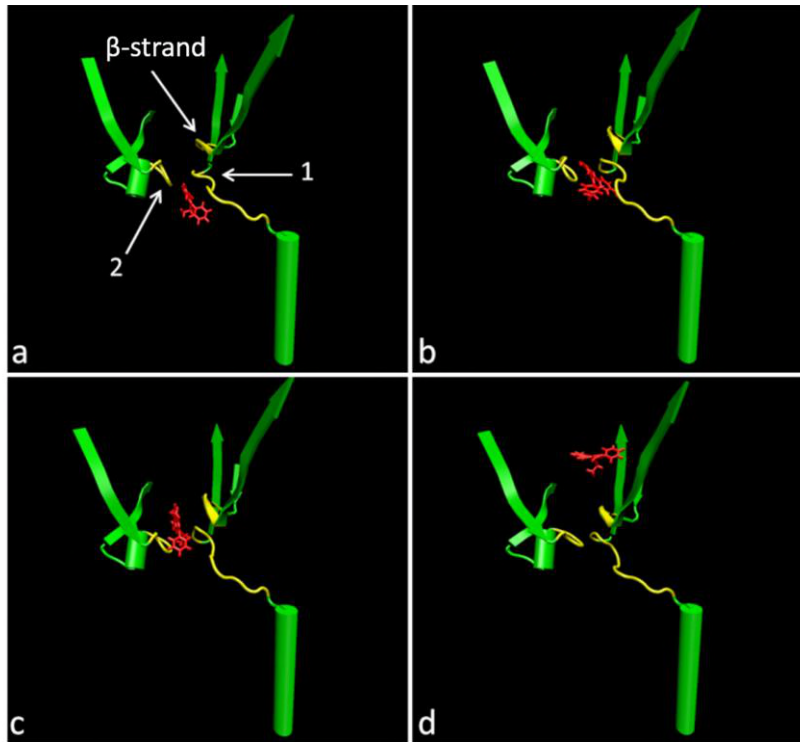

521

522 **Fig. 8:** Detailed view of loop conformational changes and  $\beta$ -strand displacement  
523 observed as ligand traverses the pore from entry position C (panel 8a) to the exit point  
524 at position D (panel 8d).

525

526

527

528

529

530

531

532

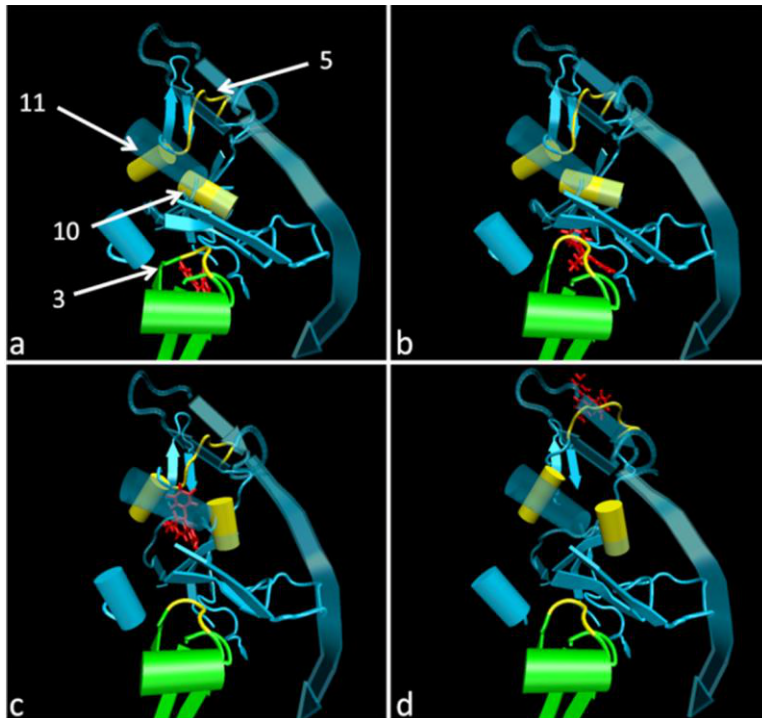

533

534

535

536

537

538

**Fig. 9:** Zone 3. Loop 3 is at the border of Zone 2 and Zone 3. Helices 10 and 11 (yellow) display prominent displacements as the ligand moves through Zone 3. Loop 5 is an extremely flexible surface loop and presumably forms contacts with the TolC protein in the periplasm.

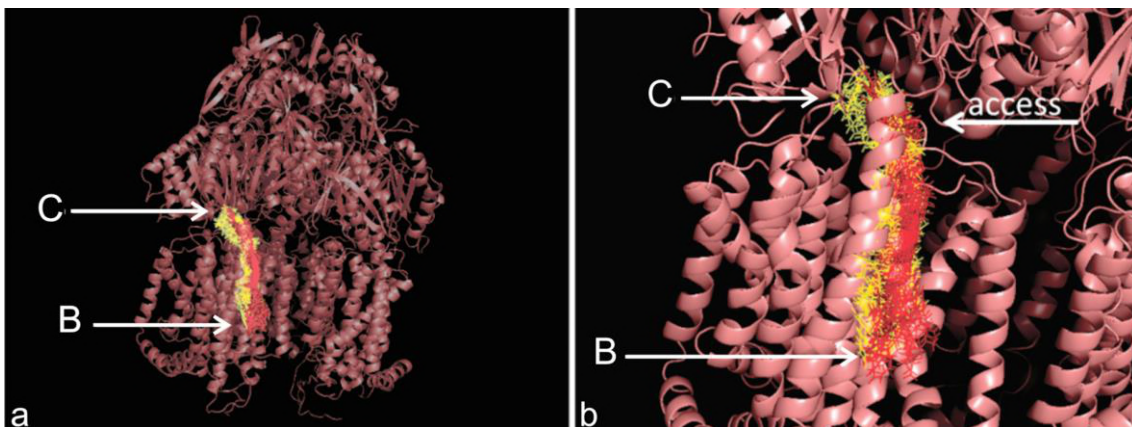

539

540

541

542

543

**Fig. 10:** Zone 1 paths for ligand entry from the bilayer region at position B. a) The EtBr path is displayed in red and NUNL02 path in yellow. B) Detailed view of ligand paths shown in panel a.



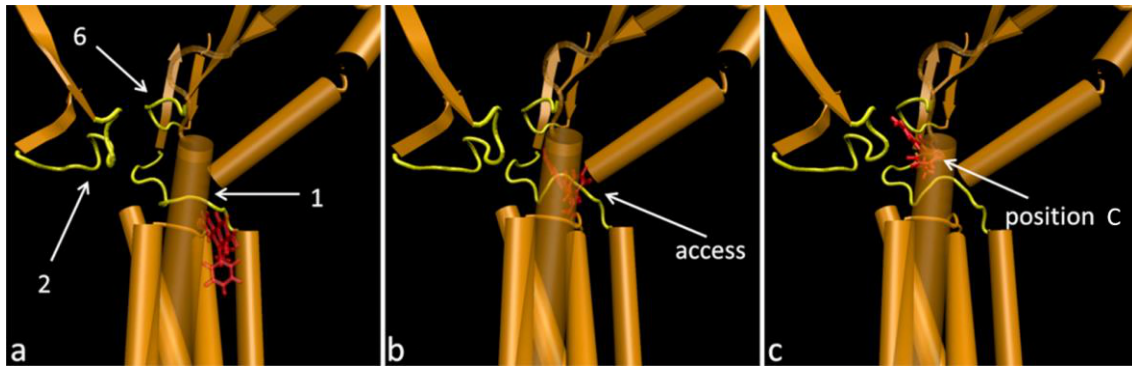

544

545 Fig. 11: a) Loop structure at the interface of the transmembrane and pore domains. b) At  
546 the ligand entry point for pathway 2, loop 1 shifts to allow substrate entrance c) Loop 1  
547 remains opened after the substrate reaches position C.

548

549

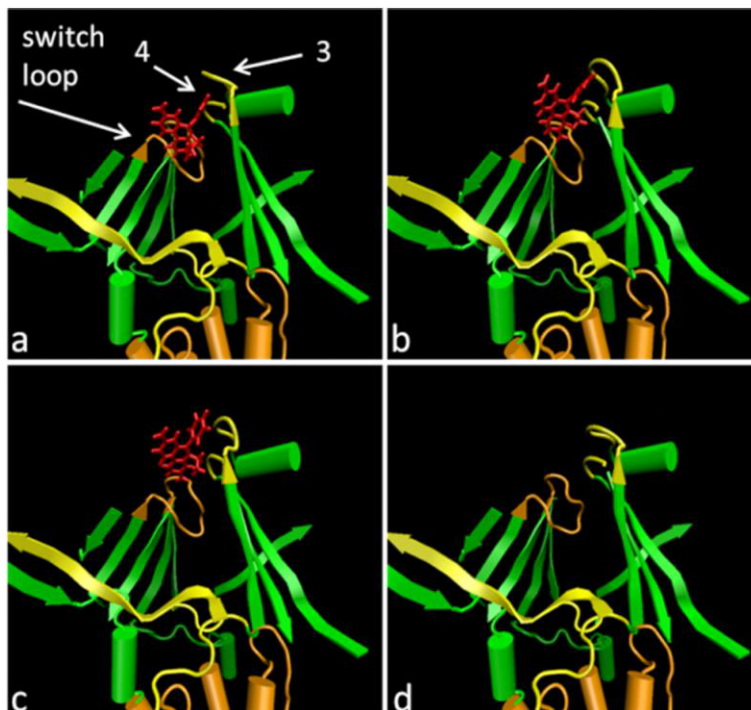

550

551 **Fig. 12:** the switch-loop in orange [18] and loops 3 and 4. Notice how loop 3 lifts to  
552 allow the passage of the substrate, EtBr (licorice, in red). Loop 4 do not show a major  
553 displacement as loop 3, but it does move, as can be noticed comparing panels a & b.

554

555

556

557

558



559 **Supplementary Figures**

560

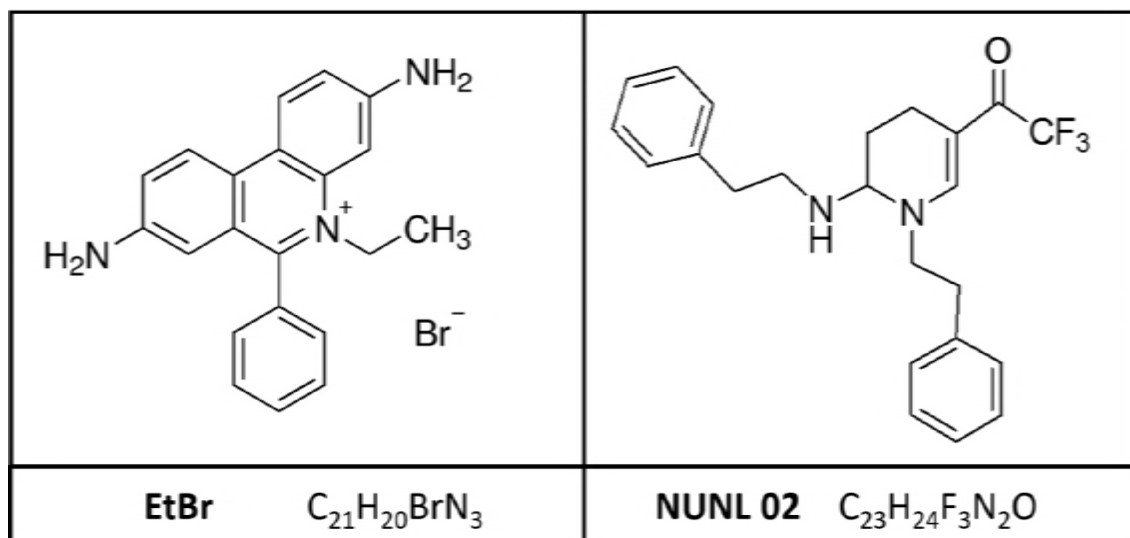

561

562 Figure A.1

563 Fig. A1: structural and molecular formula of the ethidium bromide (left, upper and lower  
564 panel) and a tetrahydropyridine derivative, NUNL02, (right, upper and lower panel),  
565 respectively.

566

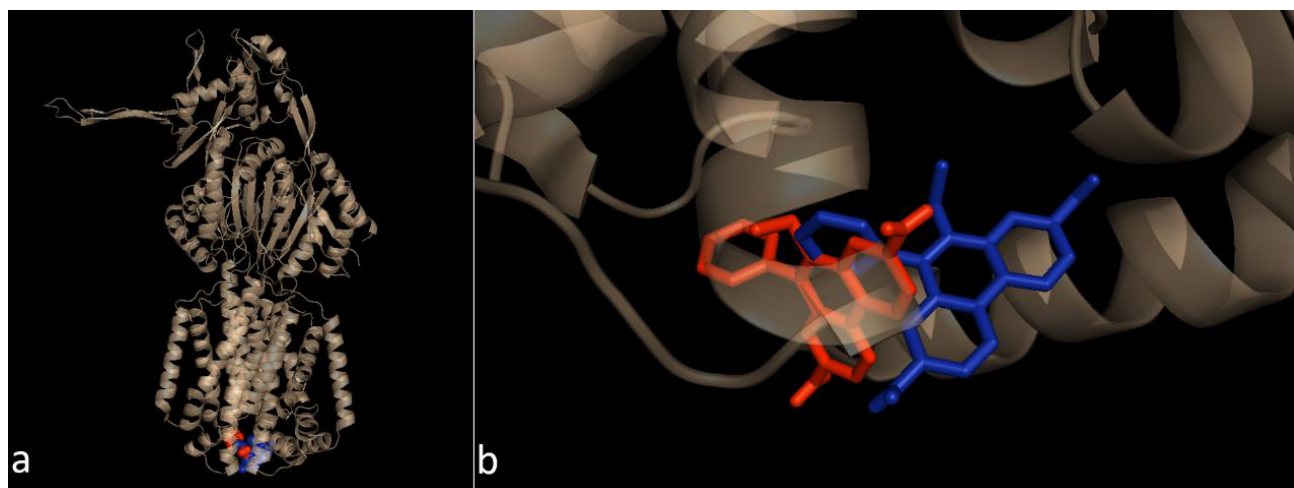

567

568 Figure A.2

569 Fig A2: Docking equivalences. a) EtBr in red spheres is in position A (FEB of -5.8 kcal/mol  
570 (exhaustiveness 8, grid 40 x 48 x 7). EtBr in blue spheres is in the alternate place found (second  
571 best pose, the first one was of a FEB of -6.7 kcal/mol and did not have superposition), when we  
572 increased the size of the grid and the exhaustiveness (FEB of -6.4 kcal/mol, exhaustiveness  
573 128, grid 65 x 65 x 23). b) There is just a slight difference in the spatial orientation between the  
574 two dockings, but the proximity of the positions is evident.

575

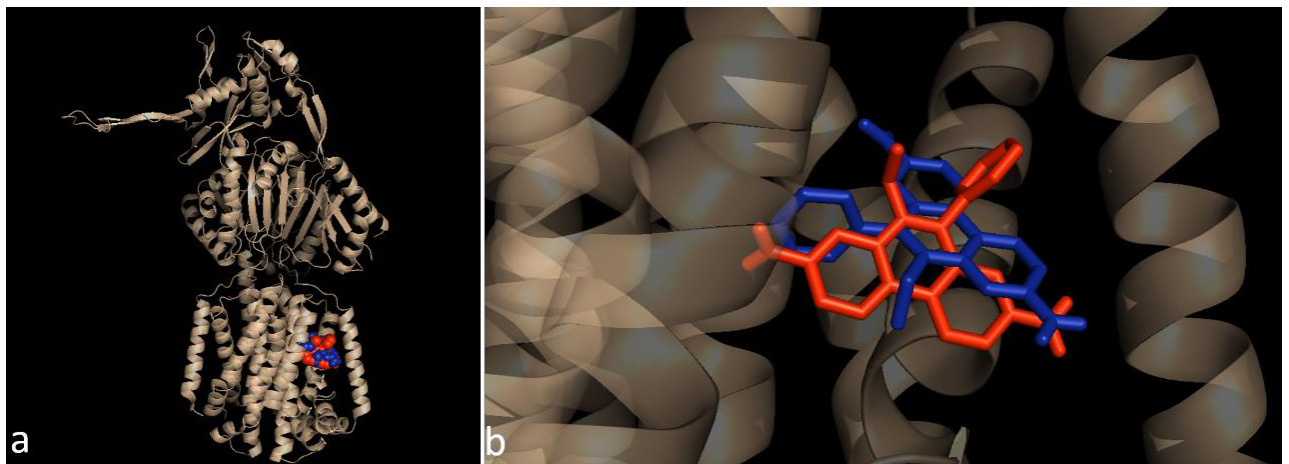

576

577 Figure A.3

578 Fig A3: Docking equivalences. a) EtBr in red spheres is in position B (FEB of -7.1 kcal/mol  
579 (exhaustiveness 8, grid 40 x 48 x 7). EtBr in blue spheres is in the alternate place found when  
580 we increased the size of the grid and the exhaustiveness (FEB of -7.6 kcal/mol, exhaustiveness  
581 128, grid 65 x 65 x 23). b) The EtBr in red (position B) and blue (alternate) sticks, for the  
582 docking variations, are occupying the same site, in a slightly diferent orientation.

583

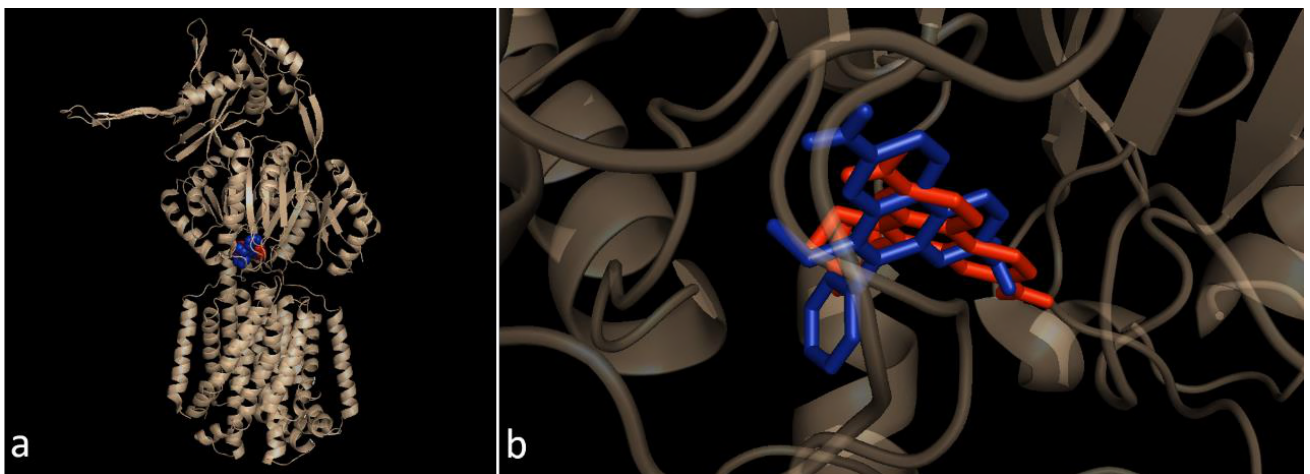

584

585 Figure A.4

586 Fig A4: Docking equivalences. a) EtBr in red spheres is in position B (FEB of -8.2 kcal/mol  
587 (exhaustiveness 8, grid 40 x 48 x 7). EtBr in blue spheres is in the alternate place found when  
588 we increased the size of the grid and the exhaustiveness (FEB of -8.7 kcal/mol, exhaustiveness  
589 128, grid 65 x 65 x 23). b) The EtBr in red (position B) and blue (alternate) sticks, for the  
590 docking variations, are occupying the same site, in a slightly diferent orientation.

591

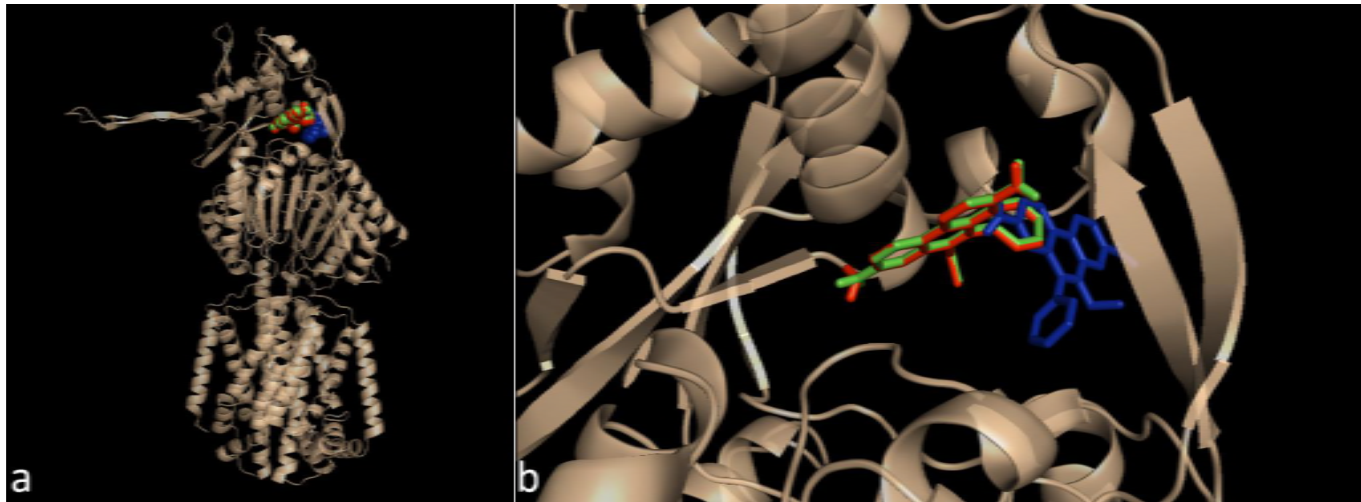

592

593 Figure A.5

594 Fig A5: Docking equivalences. a) EtBr in red spheres is in position D (FEB of -7.4 kcal/mol  
595 (exhaustiveness 8, grid 40 x 48 x 7). EtBr in blue spheres is in the alternate place found for pose  
596 1, when we increased the size of the grid and the exhaustiveness (FEB of -7.6 kcal/mol,  
597 exhaustiveness 128, grid 65 x 65 x 23), finally, the EtBr in green is the second best pose for the  
598 alternate position. b) The EtBr in red (position B) and blue (alternate) sticks, for the docking  
599 variations, are occupying the same pocket, with some superposition, however, the second best  
600 pose in green sticks (FEB of -7.4 kcal/mol) coincides with position D.

601

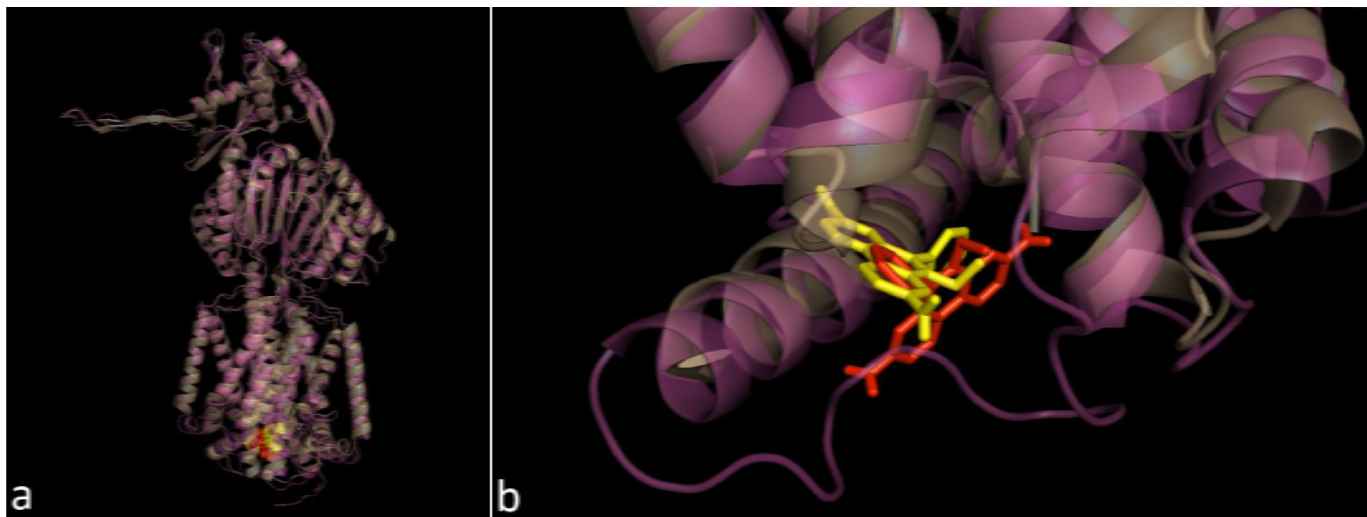

602

603 Figure A.6

604 Fig A6: Docking equivalences for EtBr in structures 1IWG (gray cartoon) and 4DX5-A (magenta).  
605 a) EtBr in red spheres is in position A (FEB of -5.8 kcal/mol (exhaustiveness 8, grid 40 x 48 x 7).  
606 EtBr in yellow spheres is in the best docking position in structure 4DX5-A (FEB of -9.4 kcal/mol,  
607 exhaustiveness 128, grid 65 x 65 x 23). b) EtBr in red sticks, for position A and in yellow sticks  
608 for the docking in structure 4DX5-A, notice the superposition between them.

25



609

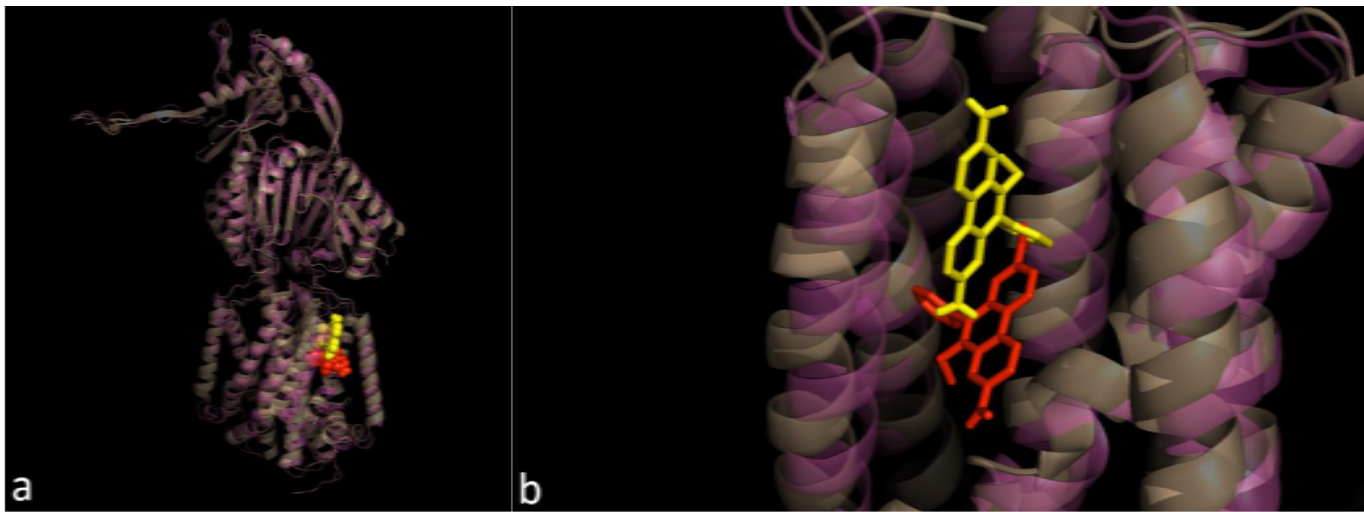

610

611 Figure A.7

612 Fig A7: Docking equivalences for EtBr in structures 1IWG (gray cartoon) and 4DX5-A (magenta).

613 a) EtBr in red spheres is in position B (FEB of -7.1 kcal/mol (exhaustiveness 8, grid 40 x 48 x 7).

614 EtBr in yellow spheres is in the best docking position in structure 4DX5-A (FEB of -7.8 kcal/mol,

615 exhaustiveness 128, grid 65 x 65 x 23). b) EtBr in red sticks, for position B and in yellow sticks

616 for the docking in structure 4DX5-A, notice the EtBr for both dockings is between the same

617 beta strands, with some superposition, although EtBr in 4DX5-A is a little above in the figure.

618

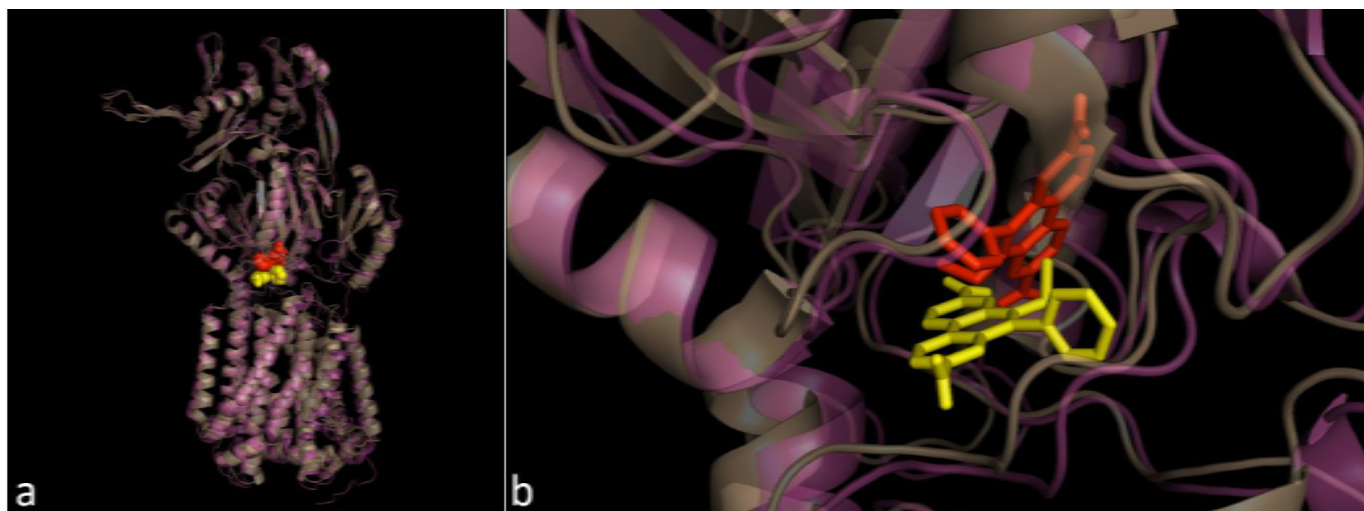

619

620 Figure A.8

621 Fig A8: Docking equivalences for EtBr in structures 1IWG (gray cartoon) and 4DX5-A (magenta).

622 a) EtBr in red spheres is in position C (FEB of -8.2 kcal/mol (exhaustiveness 8, grid 40 x 48 x 7).

623 EtBr in yellow spheres is in the best docking position in structure 4DX5-A (FEB of -8.1 kcal/mol,

624 exhaustiveness 128, grid 65 x 65 x 23). b) EtBr in red sticks, for position C and in yellow sticks

625 for the docking in structure 4DX5-A, the EtBr representations are between the same loops for  
 626 both dockings, very close with a different spatial orientation and some superposition.

627

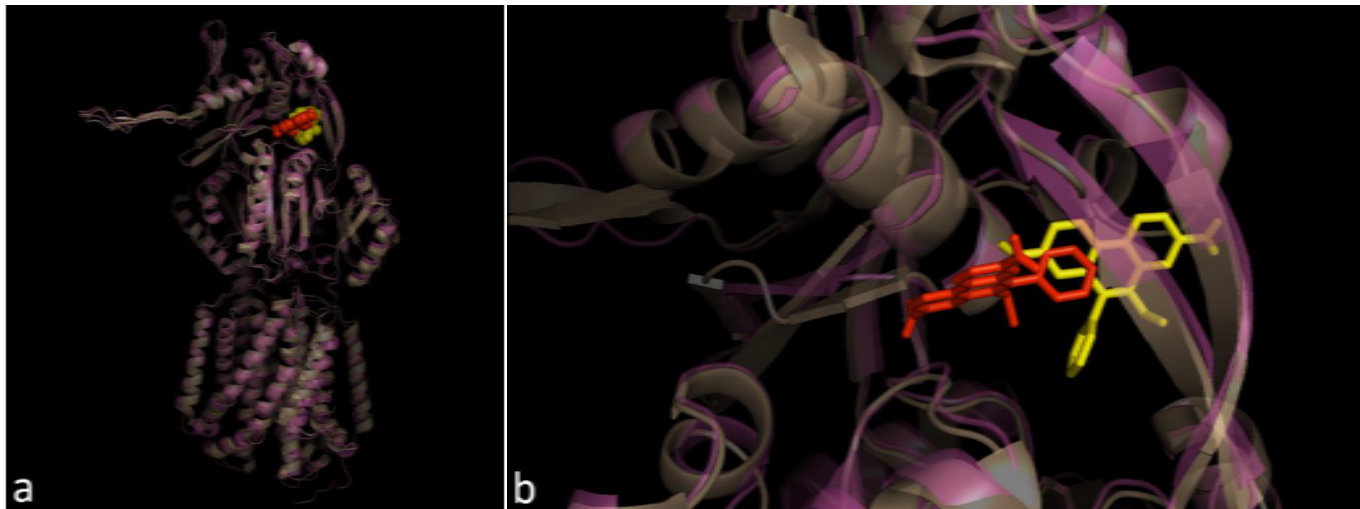

628

629 Figure A.9

630 Fig A9: Docking equivalences for EtBr in structures 1IWG (gray cartoon) and 4DX5-A (magenta).  
 631 a) EtBr in red spheres is in position C (FEB of -7.4 kcal/mol (exhaustiveness 8, grid 40 x 48 x 7).  
 632 EtBr in yellow spheres is in the best docking position in structure 4DX5-A (FEB of -7.6 kcal/mol,  
 633 exhaustiveness 128, grid 65 x 65 x 23). b) EtBr in red sticks, for position C and in yellow sticks  
 634 for the docking in structure 4DX5-A, the EtBr representations are in the same pocket for both  
 635 dockings, very close with a different spatial orientation and some superposition.

636 **Tables**

|                      | Position | A    | B    | C    | D    | E    |
|----------------------|----------|------|------|------|------|------|
| Energy<br>(kcal/mol) | EtBr     | -5.8 | -7.1 | -8.2 | -7.4 | -3.2 |
|                      | NUNL02   | -7.2 | -6.2 | -7.6 | -6.8 | -1.1 |

637 **Table 1**

638 Free energy of binding (FEB) found in run 1, for the positions that compose the  
 639 pathways for EtBr and NUNL02.

640

| Helix 1      | Helix 2      | Helix 3      | Helix 4      | Helix 5      | Helix 6      | Helix 7     | Helix 8     | Helix 9     |
|--------------|--------------|--------------|--------------|--------------|--------------|-------------|-------------|-------------|
| 367 -<br>386 | 396 -<br>421 | 428 -<br>430 | 432 -<br>436 | 443 -<br>454 | 466 -<br>476 | 481-<br>493 | 925-<br>952 | 964-<br>990 |

641 **Table 2**

642 Zone 1 helix residues displayed in Fig. 4.

643

| Loop 1  | Loop 2    | $\beta$ -strand | Loop 3  | Loop 4  |
|---------|-----------|-----------------|---------|---------|
| 30 - 42 | 668 - 678 | 132 - 144       | 49 - 53 | 84 - 85 |

644 **Table 3**

645 Residues of the loops and the  $\beta$ -strand that seemed to be of importance for the transport  
646 in Zone 2.

647

| Helix 10 | Helix 11 | Loop 5  |
|----------|----------|---------|
| 752-754  | 203-208  | 189-202 |

648 **Table 4**

649 Helix 10, 11 and loop 5 residues in Zone 3.

650

651

652
